# Supplementary material for: Cyclic NHC-stabilized silylphosphinoalanes and -gallanes
Source: Royal Society of Chemistry journal article supplement (doi:10.1039/c5dt03889h), 2015-12-22
Supplement: c5dt03889h1.pdf [file c5dt03889h1.pdf]

## Stepwise synthesis of a stable diphosasilirane and its unexpected dimerization

Manuel Kapitein,<sup>a</sup> Markus Balmer,<sup>a</sup> Lukas Niemeier,<sup>a</sup> C. v. Hänisch\*<sup>a</sup>

<sup>a</sup> Fachbereich Chemie and Wissenschaftliches Zentrum für Materialwissenschaften (WZMW), Philipps-Universität Marburg, Hans-Meerwein-Straße, 35043 Marburg, Germany, Fax: +49-6421-2825653. E-Mail: haenisch@chemie.uni-marburg.de

### Supplementary information

**General:** NMR spectra were recorded with a Bruker AV II 300 and a Bruker AV III HD 300. Coupling constants *J* are reported in Hertz (Hz) and the chemical shifts ( $\delta$ ) expressed in ppm relative to H<sub>3</sub>PO<sub>4</sub> (<sup>31</sup>P) or SiMe<sub>4</sub> (<sup>1</sup>H, <sup>13</sup>C, <sup>29</sup>Si). Due to the quadrupole moment of aluminum and gallium the metal bound hydrogen atoms are not always visible in the <sup>1</sup>H NMR spectra. Their chemical shift was determined in highly concentrated solutions. The herein presented spectra resemble the compounds **1-6** after standard workup.

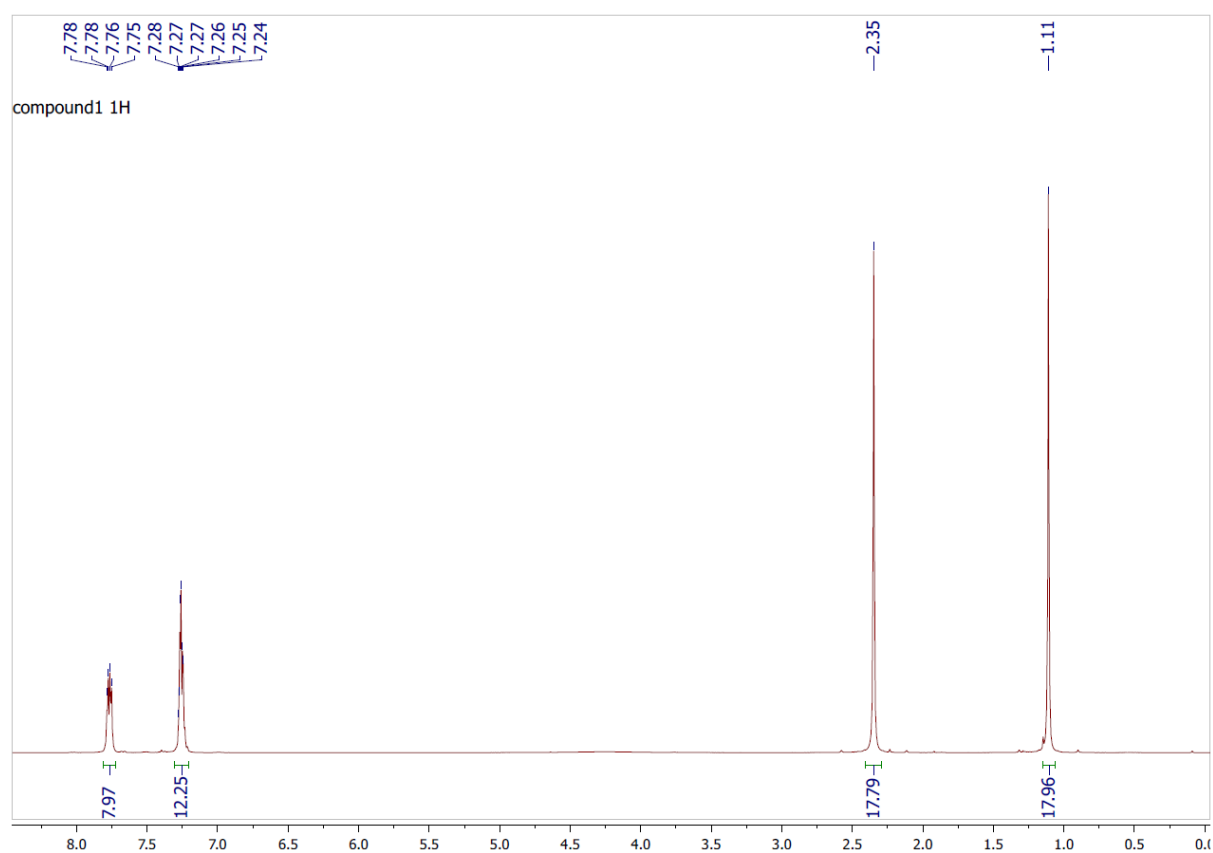

<sup>1</sup>H NMR spectrum of compound **1** in CDCl<sub>3</sub>.

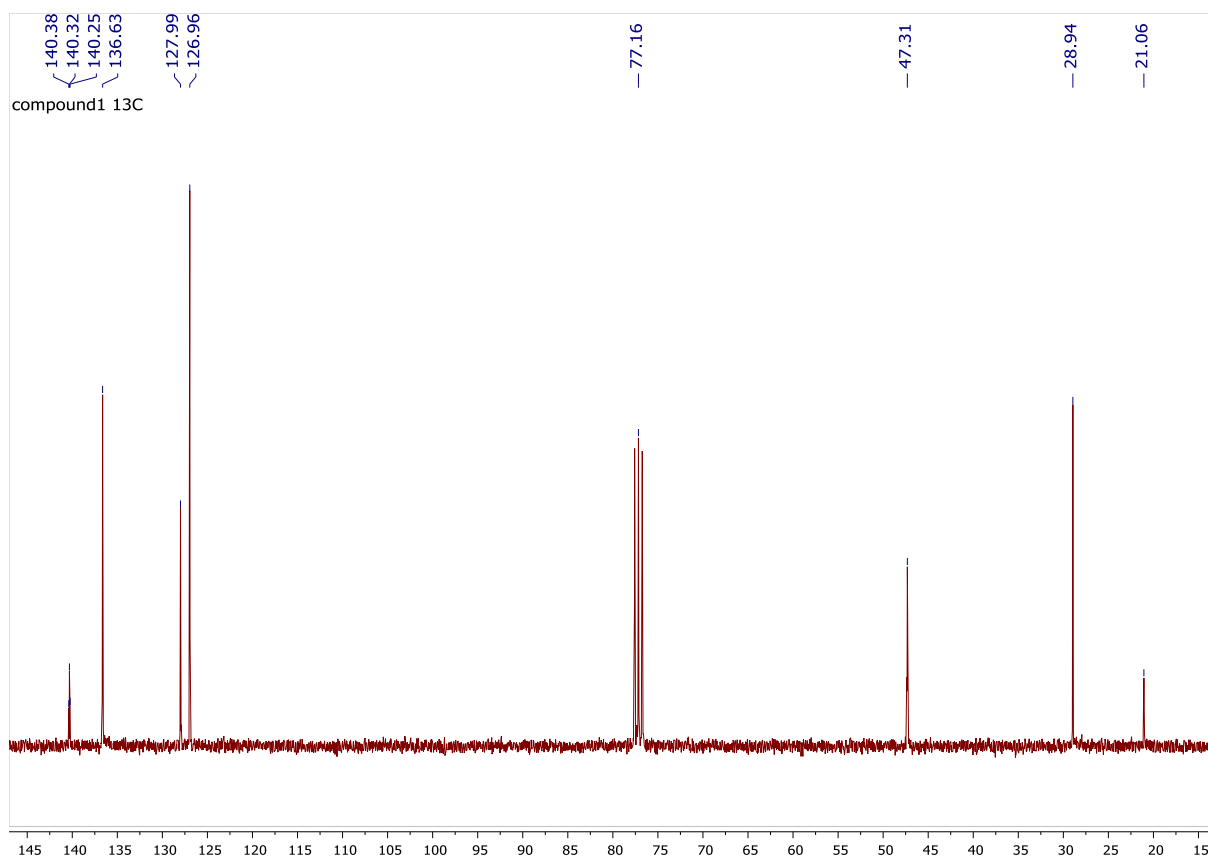

$^{13}\text{C}$  NMR spectrum of compound **1** in  $\text{CDCl}_3$ .

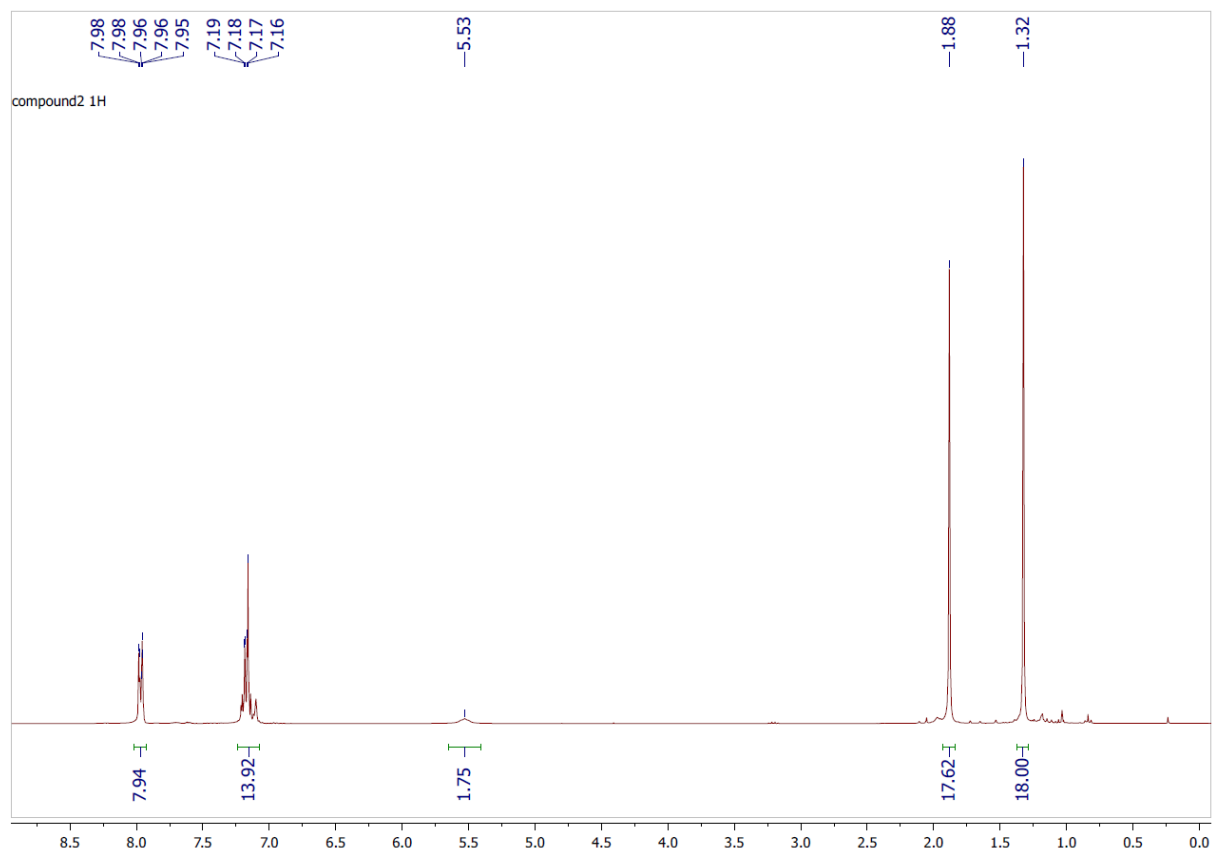

$^1\text{H}$  NMR spectrum of compound **2** in  $\text{C}_6\text{D}_6$ .

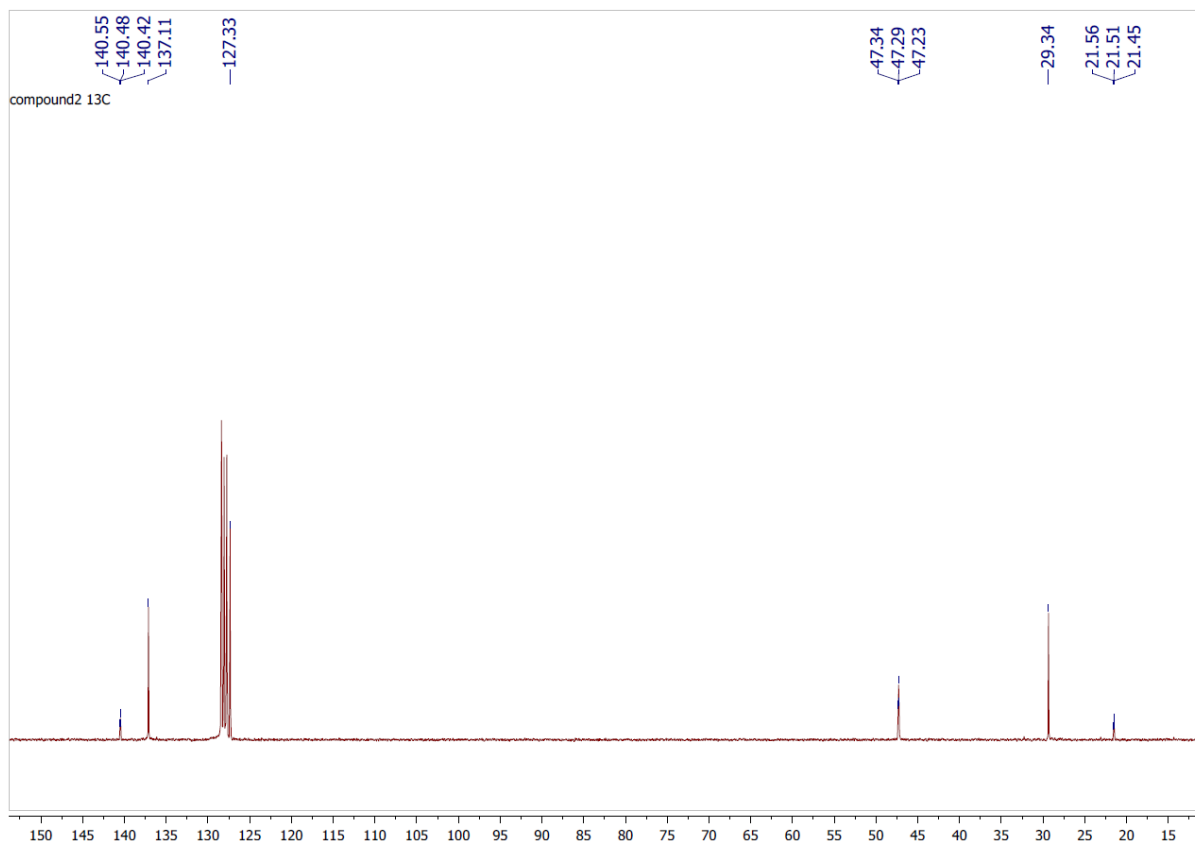

$^{13}\text{C}$  NMR spectrum of compound **2** in  $\text{C}_6\text{D}_6$ .

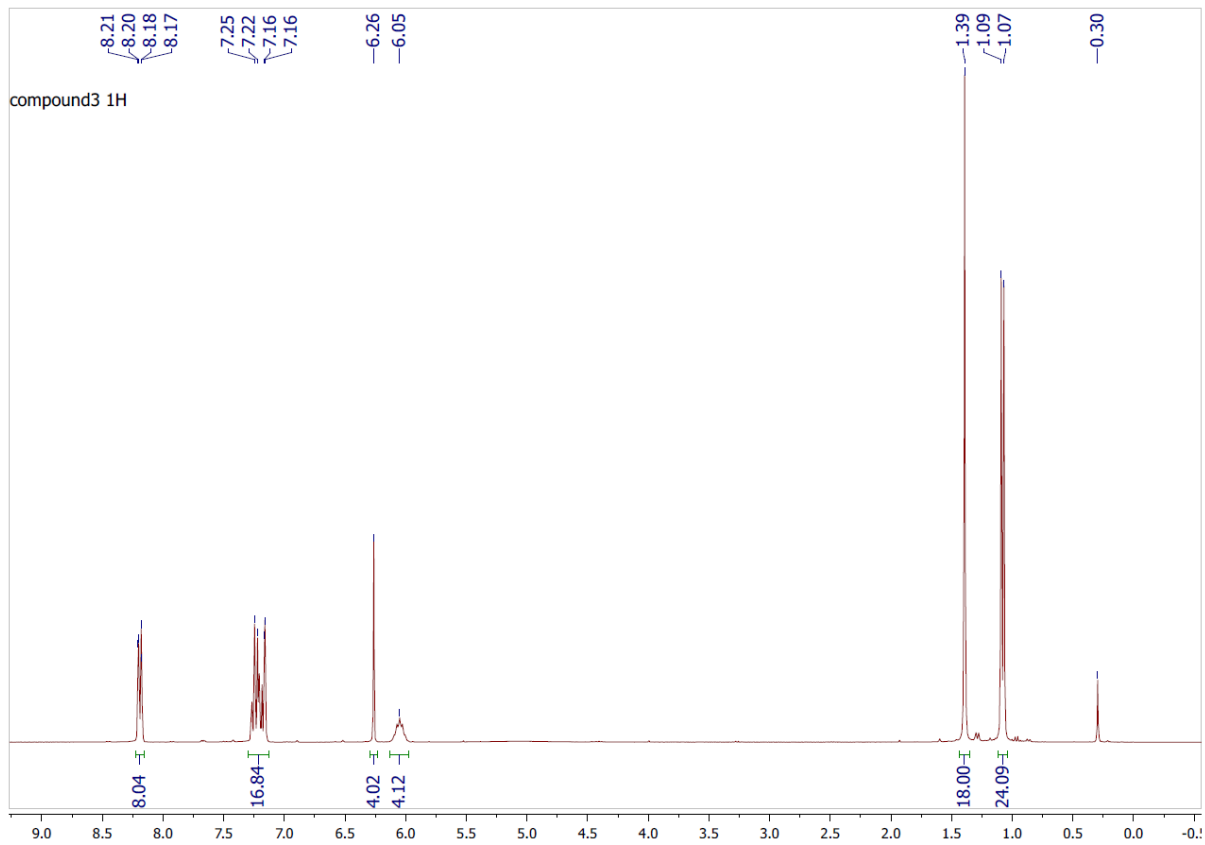

$^1\text{H}$  NMR spectrum of compound **3** in  $\text{C}_6\text{D}_6$ .

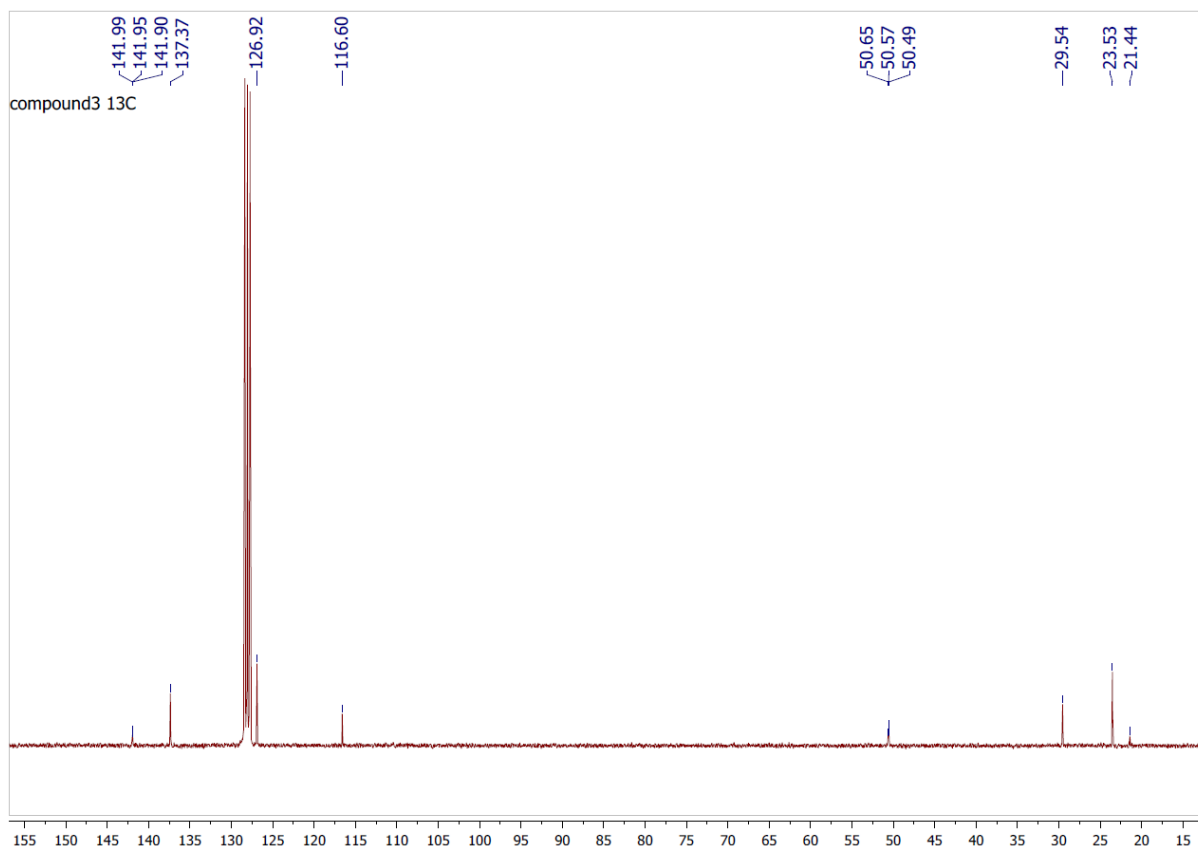

$^{13}\text{C}$  NMR spectrum of compound **3** in  $\text{C}_6\text{D}_6$ .

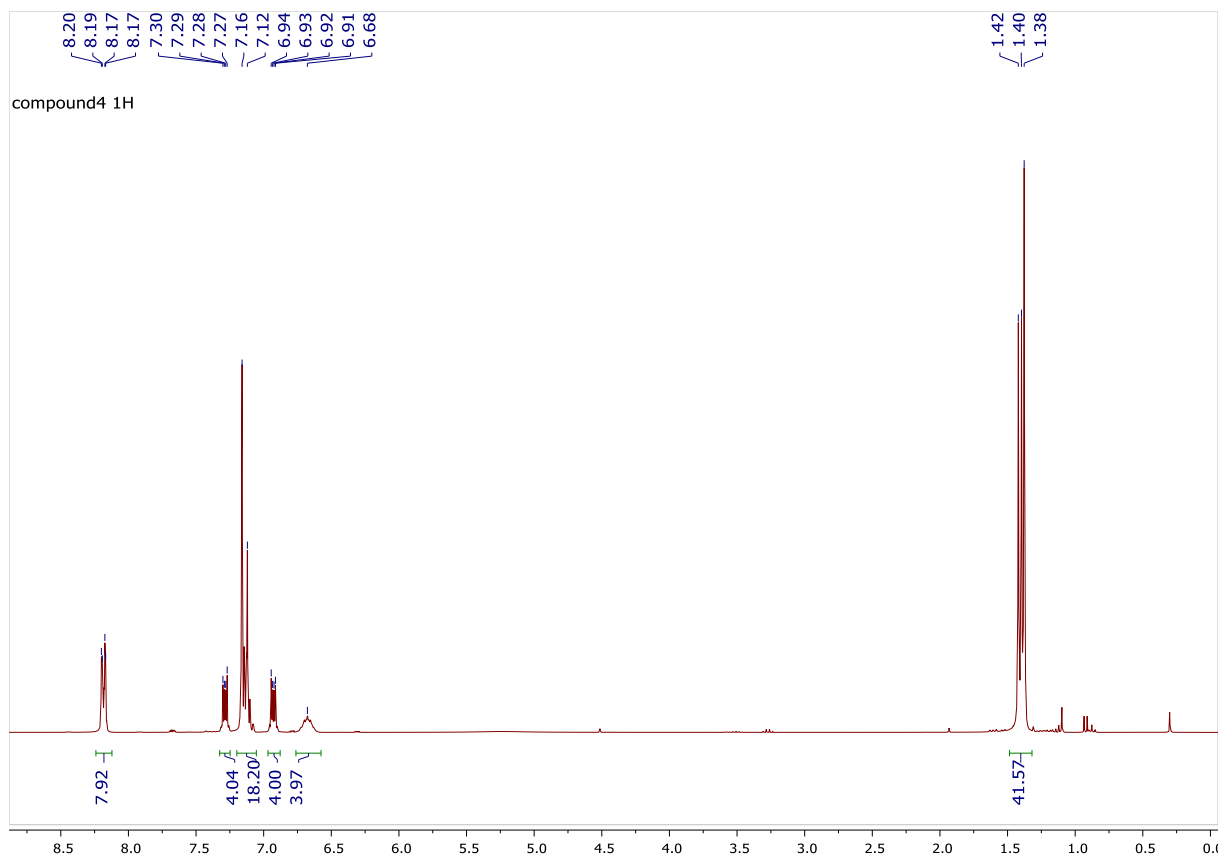

$^1\text{H}$  NMR spectrum of compound **4** in  $\text{C}_6\text{D}_6$ .

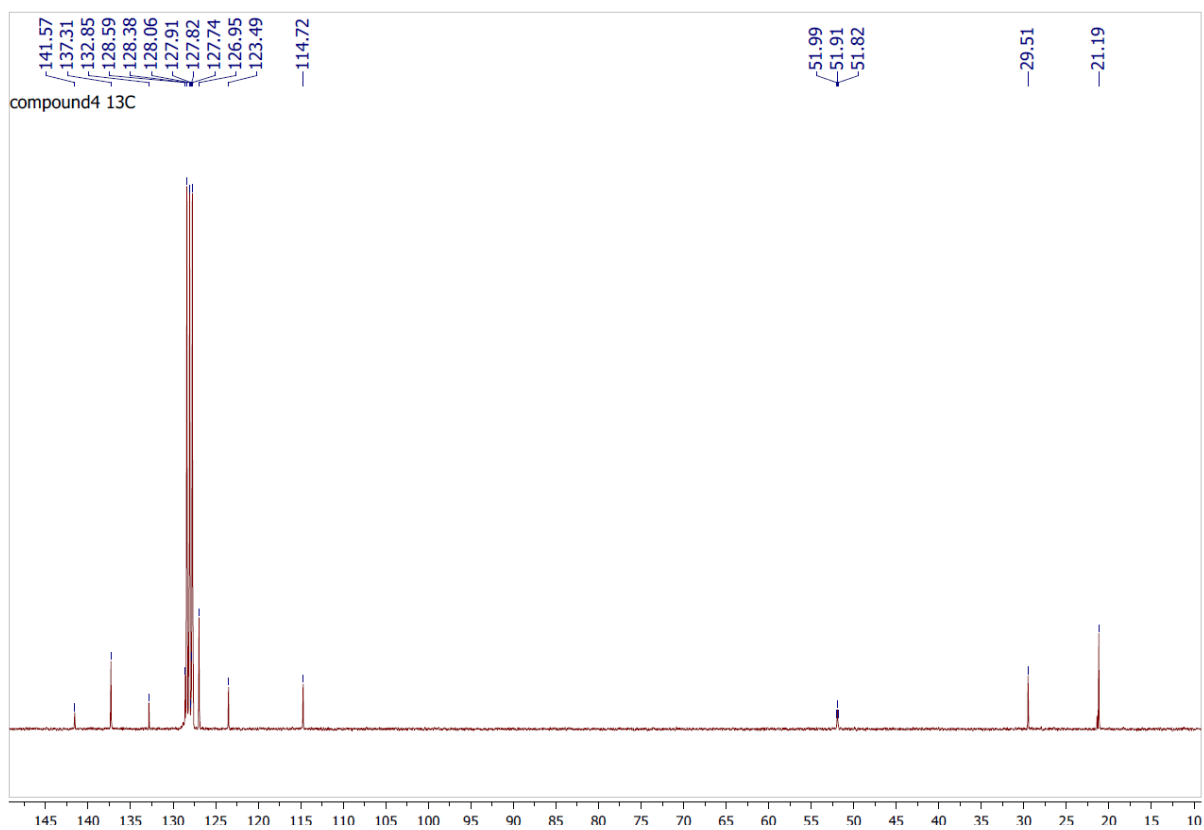

$^{13}\text{C}$  NMR spectrum of compound **4** in  $\text{C}_6\text{D}_6$ .

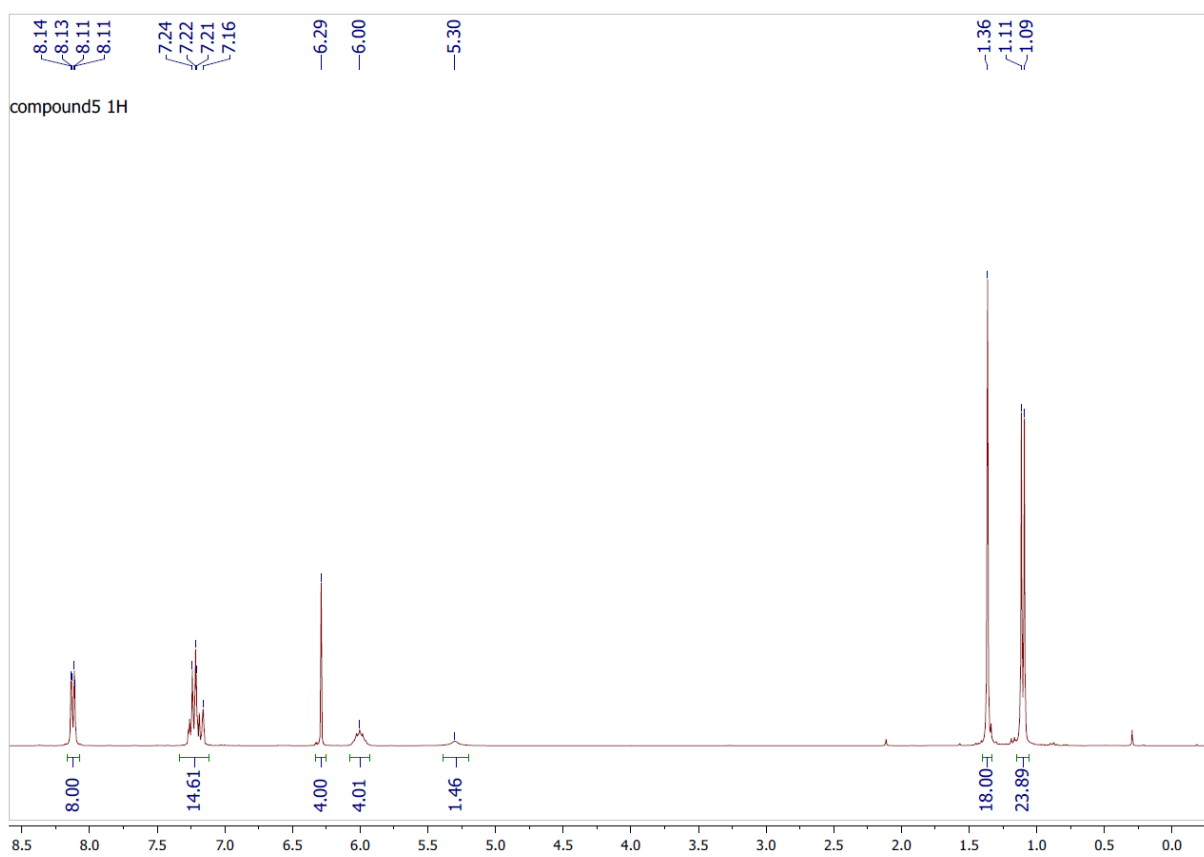

$^1\text{H}$  NMR spectrum of compound **5** in  $\text{C}_6\text{D}_6$ .

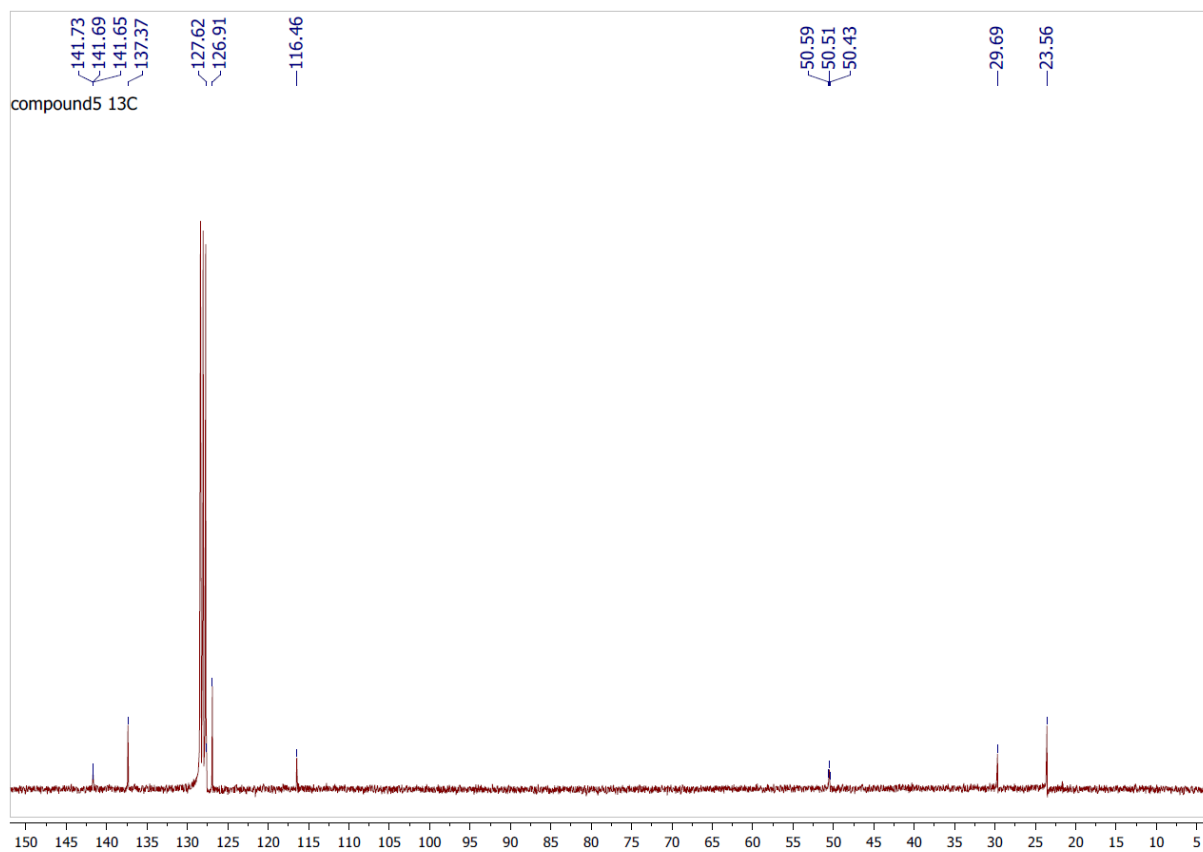

$^{13}\text{C}$  NMR spectrum of compound **5** in  $\text{C}_6\text{D}_6$ .

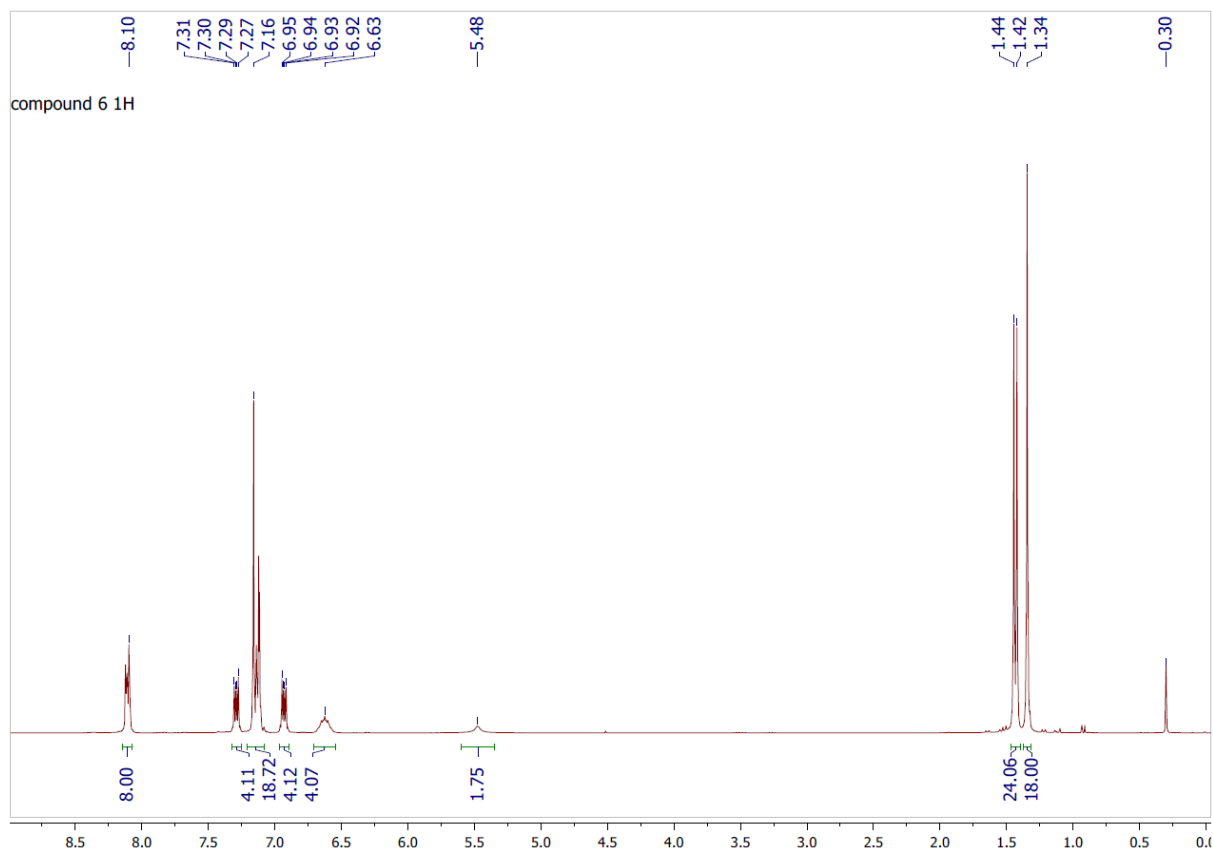

$^1\text{H}$  NMR spectrum of compound **6** in  $\text{C}_6\text{D}_6$ .

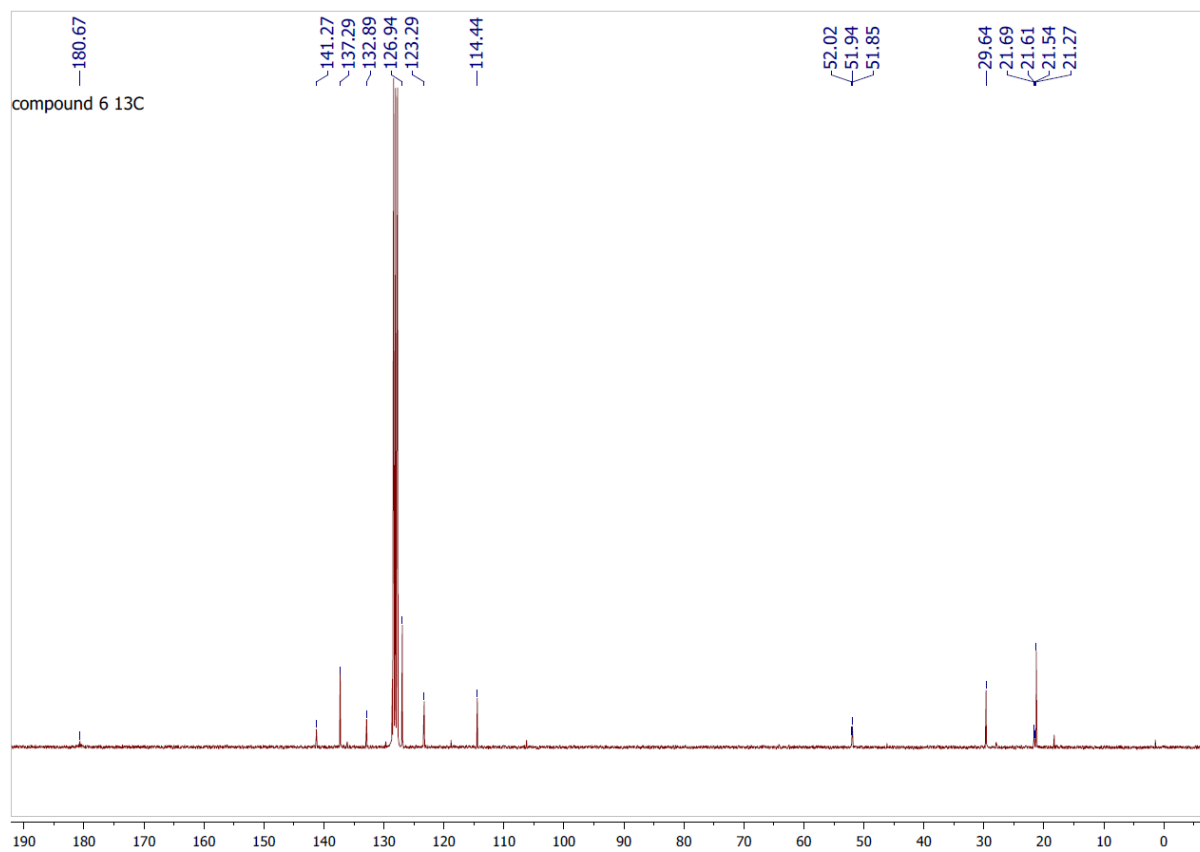

<sup>13</sup>C NMR spectrum of compound **6** in C<sub>6</sub>D<sub>6</sub>.
